# Supplementary material for: Image enhancement with art design: a visual feature approach with a CNN-transformer fusion model
Source: PeerJ Comput Sci. 2024 Nov 13;10:e2417. doi: 10.7717/peerj-cs.2417 (PMC11623052; doi:10.7717/peerj-cs.2417)
Supplement: Supplemental Information 2 [file peerj-cs-10-2417-s002.xlsx]

## Sheet: Sheet1
	AVA	DesignNet
CNN	0.78	0.76
GoogleNet	0.8	0.81
CNN+SVM	0.86	0.88
ResNet	0.82	0.84
Transformer	0.87	0.89
Ours	0.92	0.93
	AVA	DesignNet
CNN	0.76	0.79
GoogleNet	0.78	0.81
CNN+SVM	0.87	0.83
ResNet	0.82	0.8
Transforrmer	0.86	0.87
Ours	0.91	0.92
	AVA	DesignNet
CNN	0.77	0.78
GoogleNet	0.79	0.8
CNN+SVM	0.82	0.84
ResNet	0.8	0.81
Transformer	0.88	0.89
Ours	0.92	0.92

## Sheet: Sheet2
Original image	87.4
Histogram equalization	96.6
msrcr	96.4
msrcp	97.7
RetinexNet	91.2

## Sheet: Sheet3
Algorithm	DesignNet dataset		AVA dataset
	PSNR	SSIM	PSNR	SSIM
CNN	21.3	0.74	19.8	0.78
CNN+SVM	23.28	0.78	23.5	0.82
GoogleNet	18.27	0.66	17.85	0.67
ResNet	25.19	0.83	25.03	0.87
Transformer	24.24	0.85	25.21	0.88
CTGAN(Ours)	25.85	0.88	26.86	0.9
